# Supplementary material for: Enhancement of the Vegetation Carbon Uptake by the Synergistic Approach to Air Pollution Control and Carbon Neutrality in China
Source: MDPI journal article supplement (doi:10.3390/atmos15050578), 2024-05-09
Supplement: s1 [file s1]

Archive with 1 entries (1 files):
- atmosphere-2968106-supplementary.pdf
